# Supplementary material
Source: PubMed Central journal article supplement (PMC4492307)
Supplement: NIHMS695989-supplement-appendix.pdf [file NIHMS695989-supplement-appendix.pdf]

Rosen AB, Aizcorbe A, Ryu AJ, Nestoriak N, Cutler DM, Chernew ME. Policy makers will need a way to update bundled payments that reflects highly skewed spending growth of various care episodes. Health Aff (Millwood). 2013;32(5).

## Appendix

### Decomposition of spending growth

$$C^y = \sum_i \frac{c_i^y}{e_i^y} * \theta_i^y * \frac{E^y}{N^y}$$

Where  $C^y$  is the cost per capita in year  $y$ ,  $c_i$  is the spending on disease  $i$ ,  $e_i$  is the number of episodes of disease  $i$ ,  $E$  is the total number of episodes,  $\theta_i^y$  is the episode mix ( $e_i/E$ ), and  $N$  is the total number of patients.

Our change in spending per capita between years 1 and 2 is given by:

$$(1) C^2 - C^1 = \sum_i \frac{e_i^2 c_i^2}{N e_i^2} - \sum_i \frac{e_i^1 c_i^1}{N e_i^1}$$

or

$$\begin{aligned} C^2 - C^1 = & \sum_i \frac{e_i^1}{N^1} \left( \frac{c_i^2}{e_i^2} - \frac{c_i^1}{e_i^1} \right) + \sum_i \frac{c_i^1 E^1}{e_i^1 N^1} (\theta_i^2 - \theta_i^1) + \sum_i \frac{c_i^1}{e_i^1} \theta_i^1 \left( \frac{E^2}{N^2} - \frac{E^1}{N^1} \right) \\ & + \sum_i \frac{c_i^1}{e_i^1} (\theta_i^2 - \theta_i^1) \left( \frac{E^2}{N^2} - \frac{E^1}{N^1} \right) + \sum_i \left( \frac{c_i^2}{e_i^2} - \frac{c_i^1}{e_i^1} \right) \frac{E^1}{N^1} (\theta_i^2 - \theta_i^1) \\ & + \sum_i \left( \frac{c_i^2}{e_i^2} - \frac{c_i^1}{e_i^1} \right) \theta_i^1 \left( \frac{E^2}{N^2} - \frac{E^1}{N^1} \right) + \sum_i \left( \frac{c_i^2}{e_i^2} - \frac{c_i^1}{e_i^1} \right) (\theta_i^2 - \theta_i^1) \left( \frac{E^2}{N^2} - \frac{E^1}{N^1} \right) \end{aligned}$$

where each of the first three terms decompose the change in per capita spending into the change in cost per episode, the mix of episodes, and the number of episodes per person, holding the other terms at their base year level. The remaining terms are the cross interaction terms.

Rosen AB, Aizcorbe A, Ryu AJ, Nestoriak N, Cutler DM, Chernew ME. Policy makers will need a way to update bundled payments that reflects highly skewed spending growth of various care episodes. Health Aff (Millwood). 2013;32(5).

## Sensitivity Analysis Results

Sensitivity analyses truncated the cost of outlier episodes (those in the highest 1 percentile of spending) to the same cost as the 99<sup>th</sup> percentile of spending. Tables of sensitivity analysis results are included below.

**Sensitivity Analysis Table 1:** Decomposition of spending growth by episode type, 2003-2007

| Episode Type             | Growth in spending per capita (\$) | Contribution to overall spending growth (%) |
|--------------------------|------------------------------------|---------------------------------------------|
| Well care                | 61.37                              | 13.61%                                      |
| Chronic episodes         | 184.22                             | 40.85%                                      |
| Chronic maintenance      | 6.57                               | 1.46%                                       |
| Chronic with acute flare | -8.11                              | -1.80%                                      |
| Chronic non-stratified   | 185.76                             | 41.19%                                      |
| Acute episodes           | 205.42                             | 45.55%                                      |

**Source:** Authors' analysis of MarketScan® Commercial Claims and Encounters Database, 2003 and 2007.

**Notes:** Spending on outlier episodes (those in the highest 1 percentile of spending) is set to the 99<sup>th</sup> percentile of spending. Direct adjustment was used to standardize age and gender to 2003 levels to account for spending growth attributable to demographic changes in the population.

Rosen AB, Aizcorbe A, Ryu AJ, Nestoriak N, Cutler DM, Chernew ME. Policy makers will need a way to update bundled payments that reflects highly skewed spending growth of various care episodes. Health Aff (Millwood). 2013;32(5).

**Sensitivity Analysis Table 2:** Spending decomposition for diseases with largest and smallest contribution to overall spending growth, 2003-2007

|                                                               | Episode Type | Growth in spending per capita (\$) | Contribution to overall spending growth (%) | Growth in Spending per Episode (%) |
|---------------------------------------------------------------|--------------|------------------------------------|---------------------------------------------|------------------------------------|
| <b>Top 10</b>                                                 |              |                                    |                                             |                                    |
| Encounter for Preventive Health Services                      | Well Care    | 61.37                              | 13.61%                                      | 31.5%                              |
| Neoplasm, Malignant: Breast, Female                           | Chronic      | 25.55                              | 5.67%                                       | 37.5%                              |
| Osteoarthritis, Lumbar Spine                                  | Chronic      | 20.27                              | 4.49%                                       | 24.8%                              |
| Diabetes Mellitus Type 2 and Hyperglycemic States Maintenance | Chronic      | 19.20                              | 4.26%                                       | 5.4%                               |
| Osteoarthritis, Except Spine                                  | Chronic      | 18.55                              | 4.11%                                       | 31.0%                              |
| Delivery, Cesarean Section                                    | Acute        | 14.24                              | 3.16%                                       | 12.0%                              |
| Neoplasm, Malignant: Colon and Rectum                         | Chronic      | 13.39                              | 2.97%                                       | 54.1%                              |
| Renal Failure                                                 | Chronic      | 10.63                              | 2.36%                                       | -26.5%                             |
| Multiple Sclerosis                                            | Chronic      | 10.45                              | 2.32%                                       | 47.8%                              |
| Dysfunctional Uterine Bleeding                                | Acute        | 8.16                               | 1.81%                                       | 34.7%                              |
| <b>Bottom 10</b>                                              |              |                                    |                                             |                                    |
| Neoplasm, Benign: Uterus (Leiomyomas)                         | Acute        | -1.09                              | -0.24%                                      | 4.7%                               |
| Other Fungal Infections                                       | Acute        | -1.09                              | -0.24%                                      | -11.4%                             |
| Sleep Disorders                                               | Acute        | -1.66                              | -0.37%                                      | -38.5%                             |
| Congestive Heart Failure                                      | Chronic      | -1.79                              | -0.40%                                      | 4.9%                               |
| Endometriosis                                                 | Acute        | -1.89                              | -0.42%                                      | 7.9%                               |
| Hepatitis C                                                   | Chronic      | -2.03                              | -0.45%                                      | -21.1%                             |
| Sinusitis                                                     | Acute        | -2.54                              | -0.56%                                      | -8.8%                              |
| Depression                                                    | Acute        | -3.70                              | -0.82%                                      | -5.8%                              |
| Acute Myocardial Infarction                                   | Chronic *    | -7.78                              | -1.72%                                      | 6.7%                               |
| Angina Pectoris, Chronic Maintenance                          | Chronic      | -23.5231                           | -5.22%                                      | -9.2%                              |

Rosen AB, Aizcorbe A, Ryu AJ, Nestoriak N, Cutler DM, Chernew ME. Policy makers will need a way to update bundled payments that reflects highly skewed spending growth of various care episodes. *Health Aff (Millwood)*. 2013;32(5).

**Source:** Authors' analysis of MarketScan® Commercial Claims and Encounters Database, 2003 and 2007.

**Notes:** Spending on outlier episodes (those in the highest percentile of spending) is set to the 99<sup>th</sup> percentile of spending. Direct adjustment was used to standardize age and gender to 2003 levels to account for spending growth attributable to demographic changes in the population.

\*Episode type considered chronic with acute exacerbation.
